# Supplementary material for: The first apicoplast tRNA thiouridylase plays a vital role in the growth of Toxoplasma gondii
Source: Front Cell Infect Microbiol. 2022 Aug 15;12:947039. doi: 10.3389/fcimb.2022.947039 (PMC9420914; doi:10.3389/fcimb.2022.947039)
Supplement: Supplementary Table S1 — Gene contents of the Toxoplasma gondii apicoplast genome. [file Table_1.docx]

Table S1 Gene contents of the *Toxoplasma gondii* apicoplast genome

| **Class** | **Gene** |
| --- | --- |
| Ribosomal RNA | *SSU*, *LSU*, *LSU*, *SSU* |
| Transfer RNAa | IleAUCAlaGCAAsnAACLeuCUAArgAGAValGUAArgCGUMetAUGThrACA  HisCACCysUGCLeuUUAMetAUGTyrUACSerAGCAspGACLysAAAGluGAA  ProCCAPheUUCGlnCAATrpUGGGlyGGASerUCAThrACAMetAUGArgCGU  ValGUAArgAGALeuCUAAsnAACAlaGCAIleAUC |
| Ribosomal proteins | *rps*2, 3, 4, 5, 7, 11, 12, 17, 19  *rpl*2, 4, 6, 11, 14, 16, 36 |
| RNA polymerase | *rpo*B, *rpo*C1 |
| Other proteins | *Clp*, *tufA* |
| Unassigned ORFs | 5 ORFs (ORF B, C, D, E, F), ycf24 homolog |
| misc_feature | *rps*8, *rpo*C2 |

a Three-letter amino acid code
